# Supplementary material
Source: MDPI journal article supplement (https://www.mdpi.com/2297-8739/11/4/108)
Supplement: s1 [file s1]

# **Supplementary Materials: Carbon–Carbon Composite Membranes Derived from Small-Molecule-Compatibilized Immiscible PBI/6FDA-DAM-DABA Polymer Blends**

**Chamaal Karunaweera, Nimanka P. Panapitiya, Samitha Panangala, Edson V. Perez, Inga H. Musselman, Kenneth J. Balkus, Jr. and John P. Ferraris \***

Department of Chemistry and Biochemistry, The University of Texas at Dallas, 800 W. Campbell Rd, Richardson, TX 75080, USA; chamaalk@gmail.com (C.K.); nimanka.panapitiya@utdallas.edu (N.P.P.); sdp021@shsu.edu (S.P.); edson.perez@utdallas.edu (E.V.P.); inga.musselman@utdallas.edu (I.H.M.); kenneth.balkus@utdallas.edu (K.J.B.J.)

\* Correspondence: ferraris@utdallas.edu

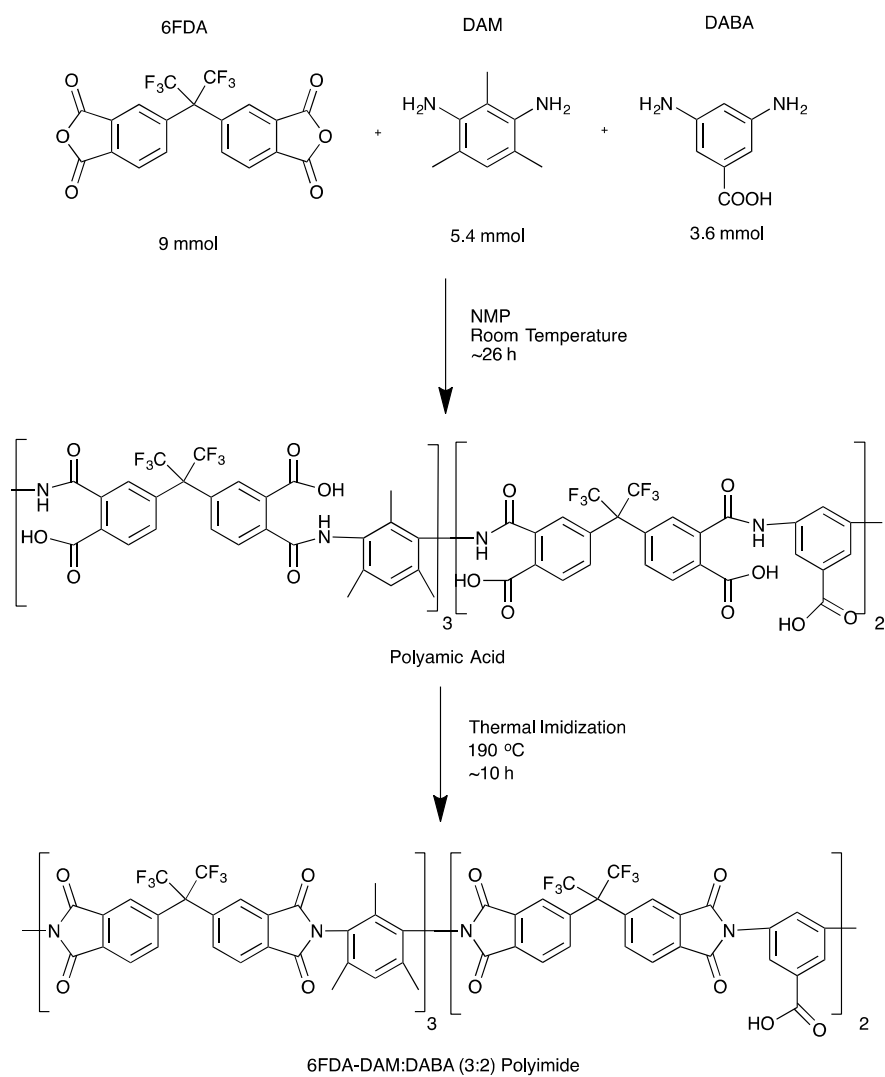

**Figure S1.** Synthesis route for 6FDA-DAM:DABA [3:2], (6FDD).

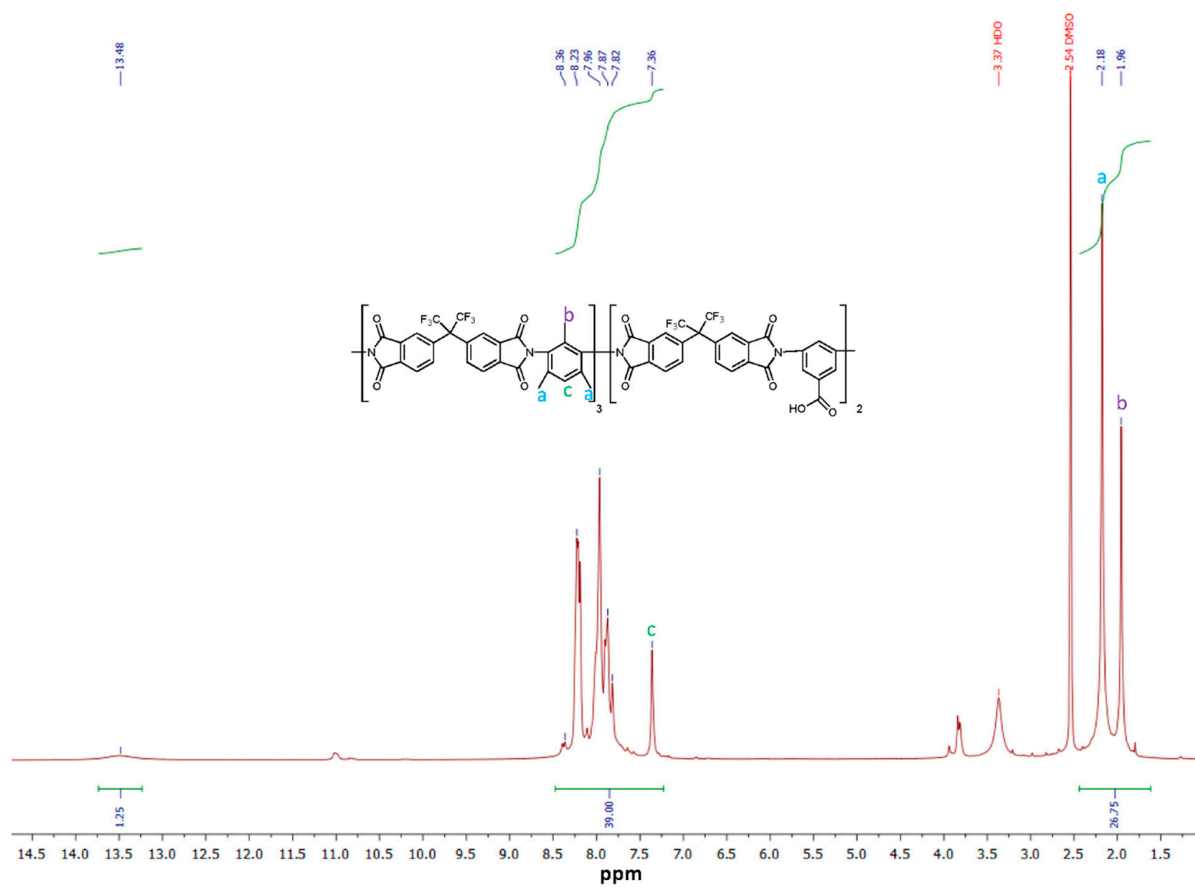

**Figure S2.**  $^1\text{H}$  NMR spectrum of 6FDD in  $\text{DMSO-}d_6$ . Reported chemical shifts in [70,71].

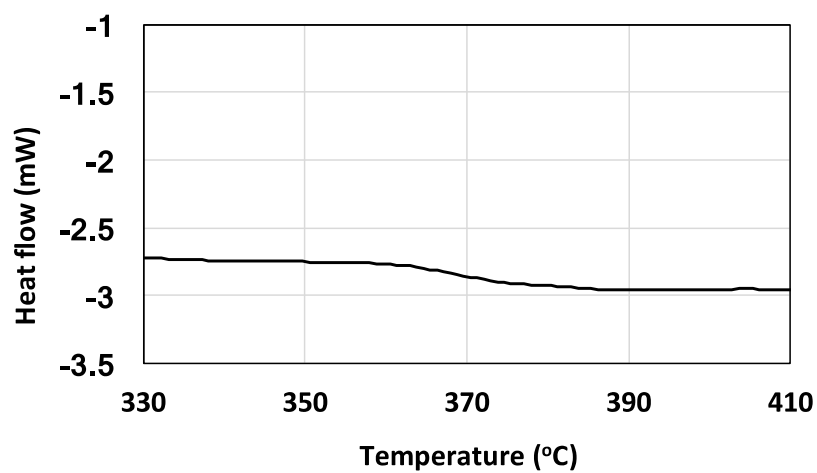

**Figure S3.** Differential scanning calorimetry of 6FDD at a scan rate of 10 °C/min in UHP N<sub>2</sub> at 50 mL/min. T<sub>g</sub> = 370 °C - 375 °C, reported T<sub>g</sub> = 387 °C [72].

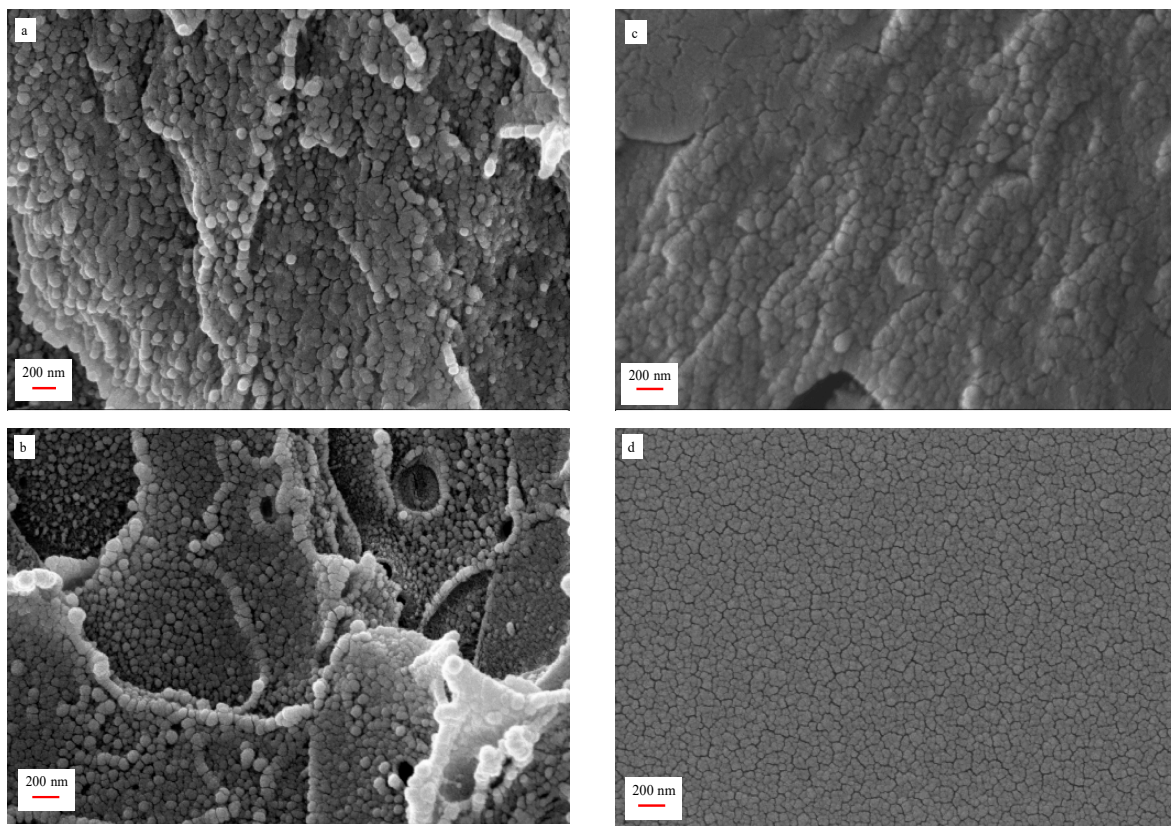

**Figure S4.** Cross-section SEM images of: a) PBI, b) 6FDD, c) PBI CMSM, d) 6FDD CMSM.

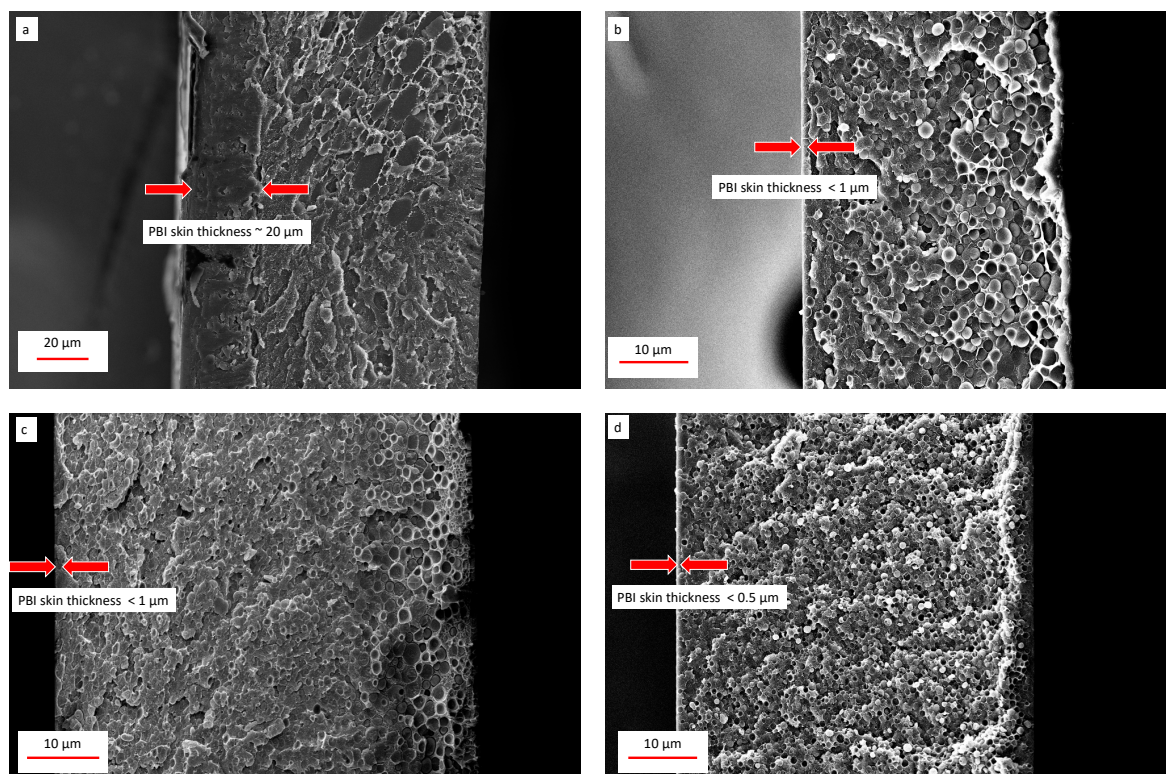

**Figure S5.** Cross-section SEM images of immiscible polymer blend membranes: a) 0DuD-6FDD:PBI, b) 5DuD-6FDD:PBI, c) 9DuD-6FDD:PBI, d) 17DuD-6FDD:PBI.

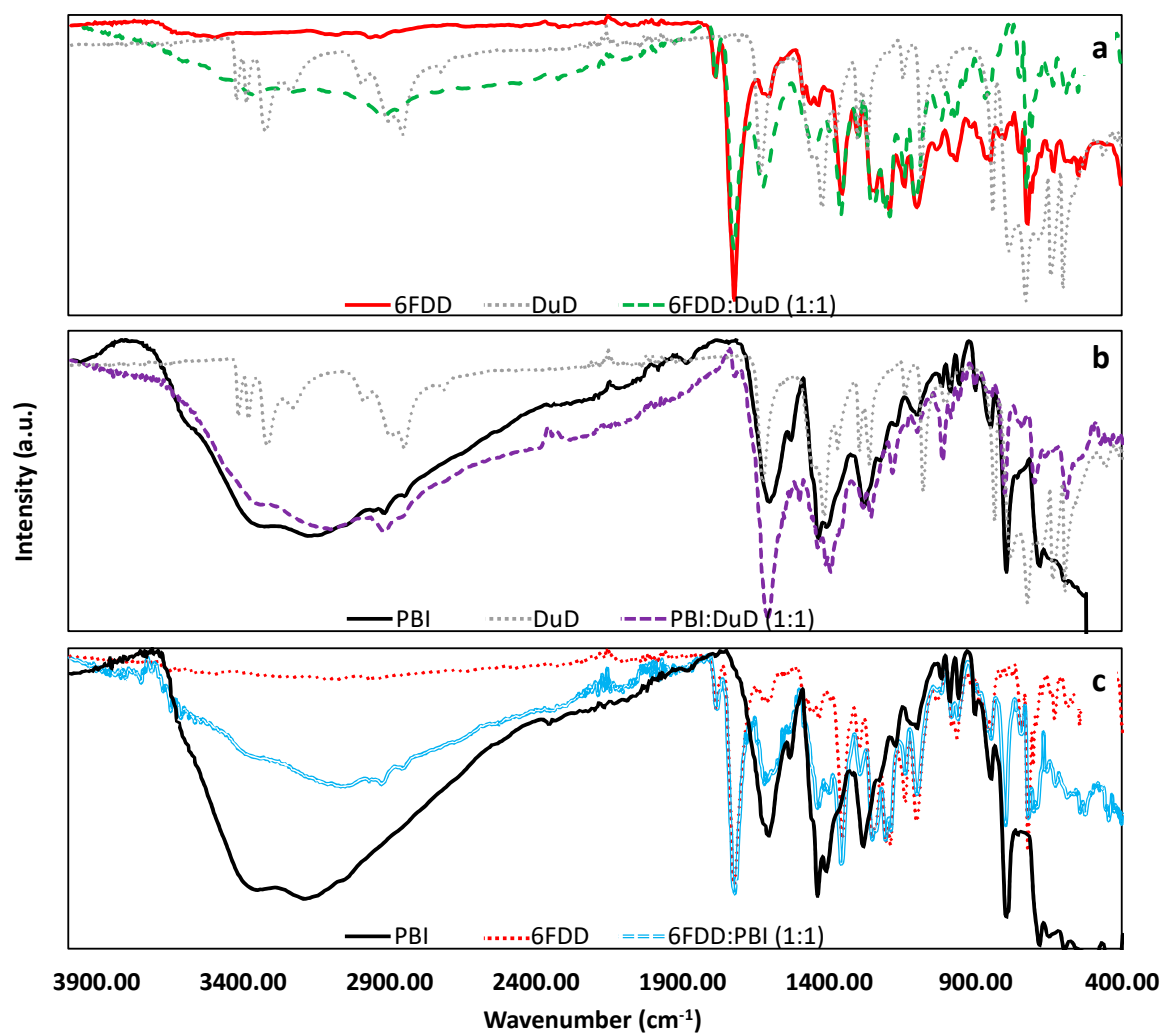

**Figure S6.** ATR-FTIR spectra of the prepared membranes: a) 6FDD:DuD, b) PBI:DuD, c) 6FDD:PBI.

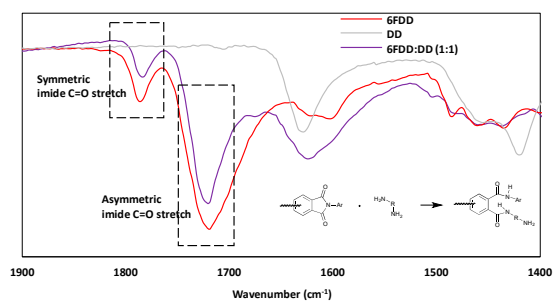

**Figure S7.** FTIR spectra of 6FDD, DD, and 6FDD:DD [1:1]



### Supplementary equations

Gas transport models for immiscible polymer blends [58]:

**a) Parallel model:**

$$P = \Phi_c P_c + \Phi_d P_d \quad \text{Eq.1}$$

**b) Series model:**

$$P = P_c P_d / (\Phi_c P_d + \Phi_d P_c) \quad \text{Eq. 2}$$

**c) Maxwell's model:**

$$P = P_c \left[ \frac{P_d + 2P_c - 2\Phi_d(P_c - P_d)}{P_d + 2P_c + \Phi_d(P_c - P_d)} \right] \quad \text{Eq. 3}$$

Where  $P$  is the permeability of the blend,  $\Phi_c$  and  $\Phi_d$  are the volume fractions of the continuous and discontinuous phases, respectively, and  $P_c$  and  $P_d$  are their experimental permeabilities.

**d) Equivalent box model:**

$$P = P_1 \Phi_{1p} + P_2 \Phi_{2p} + \Phi_S^2 \left/ \left[ \frac{\Phi_{1s}}{P_1} + \frac{\Phi_{2s}}{P_2} \right] \right. \quad \text{Eq. 4}$$

where:

$$\Phi_S = \Phi_{1s} + \Phi_{2s}$$

$$\Phi_{1p} = [(\Phi_1 - \Phi_{1cr}) / (1 - \Phi_{1cr})]^{T_1}$$

$$\Phi_{2p} = [(\Phi_2 - \Phi_{2cr}) / (1 - \Phi_{2cr})]^{T_2}$$

$$\Phi_{1s} = \Phi_1 - \Phi_{1p}$$

$$\Phi_{2s} = \Phi_2 - \Phi_{2p}$$

and  $P_1$  and  $P_2$  are the permeabilities of components 1 and 2,  $\Phi_{1cr}$  and  $\Phi_{2cr}$  are the critical threshold percolation values, and  $T_1$  and  $T_2$  are the critical universal exponents.

## References:

58. Robeson, L.M. Polymer Blends in Membrane Transport Processes. *Ind. Eng. Chem. Res.* **2010**, *49*, 11859–11865.
70. Kumar, A.; Tateyama, S.; Yasaki, K.; Ali, M.A.; Takaya, N.; Singh, R.; Kaneko, T. <sup>1</sup>H NMR and FT-IR dataset based structural investigation of poly(amic acid)s and polyimides from 4,4'-diaminostilbene, *Data in Brief* **2016**, *7*, 123–128.
71. Kim, Y.J.; Glass, T.E.; Lyle, G.D.; McGrath, J.E. Kinetic and mechanistic investigations of the formation of polyimides under homogeneous conditions, *Macromolecules* **1993**, *26*, 1344–1358.
72. Qiu, W.; Chen, C.-C.; Xu, L.; Cui, L.; Paul, D.R.; Koros, W.J. Sub-*T<sub>g</sub>* cross-linking of a polyimide membrane for enhanced CO<sub>2</sub> plasticization resistance for natural gas separation, *Macromolecules* **2011**, *44*, 6046–6056.
